# Supplementary material
Source: HighWire-hosted journal article supplement (https://jech.bmj.com/content/77/11/728)
Supplement: inline-supplementary-material-1 [file inline-supplementary-material-1.pdf]

## Extreme Heat and Cognitive Decline

1

**Supplementary Appendix 1.**

$$\begin{aligned} \text{Cognitive function}_{ij} = & \gamma_{00} + \gamma_{10} \text{Age}_{ij} + \gamma_{20} \text{Age}_{ij}^2 + \\ & \gamma_{01} \text{Heat}_i + \gamma_{02} \text{Group}_i + \gamma_{03} (\text{Heat}_i \times \text{Group}_i) + \beta_{yx} X_{ij} + \beta_{yz} Z_i + \\ & \gamma_{11} \text{Heat}_i \text{Age}_{ij} + \gamma_{12} \text{Group}_i \text{Age}_{ij} + \gamma_{13} (\text{Heat}_i \times \text{Group}_i) \text{Age}_{ij} + \\ & \beta_{yxt} X_{ij} \text{Age}_{ij} + \beta_{yzt} Z_i \text{Age}_{ij} + \zeta_{0i} + \zeta_{1i} \text{Age}_{ij} + \varepsilon_{ij} \end{aligned}$$

where subscripts  $j$  represents measurement occasion (survey wave) and  $i$  represents individual. Cognitive function $_{ij}$  is the value of cognitive scores for individual  $i$  at occasion  $j$ .  $\gamma_{00}$  is the average intercept,  $\gamma_{10}$  and  $\gamma_{20}$  are the average effects for the linear and quadratic terms of age.  $\gamma_{01}$ ,  $\gamma_{02}$ , and  $\gamma_{03}$  represent the effects of extreme heat exposure, a subgroup (i.e., race/ethnicity, neighbourhood socioeconomic status), and their interactions on the intercept.  $\gamma_{11}$ ,  $\gamma_{12}$ , and  $\gamma_{13}$  are the effects of extreme heat exposure, a subgroup, and their interactions with the linear term of age.  $X_{ij}$  is a vector of time-varying covariates (living arrangement and household wealth) for the individual  $i$  at observation  $j$ , while  $Z_i$  is a vector of time-constant covariates (sex, education, region of residence, urbanicity, and years of follow-up) for the individual  $i$ .  $\beta_{yx}$  and  $\beta_{yz}$  denote vectors of coefficients for the effects of covariates  $X_{ij}$  and  $Z_i$  on the intercept.  $\beta_{yxt}$  and  $\beta_{yzt}$  are vectors of coefficients for the effects of covariates  $X_{ij}$  and  $Z_i$  on the rate of change with age.  $\zeta_{0i}$  and  $\zeta_{1i}$  are a random intercept and linear slope of age.  $\varepsilon_{ij}$  is the occasion-specific error term.

## Extreme Heat and Cognitive Decline

2

**Supplementary Table 1.** Differences in Extreme Heat Exposure Across Subgroups

|                         | % High exposure | Group comparison                |
|-------------------------|-----------------|---------------------------------|
| <i>Race/ethnicity</i>   |                 |                                 |
| White                   | 16.9            | vs. Black ( $p < .001$ )        |
| <b>Black</b>            | <b>32.5</b>     | vs. Hispanic ( $p < .001$ )     |
| Hispanic                | 11.0            | vs. White ( $p = .01$ )         |
| <i>Neighborhood SES</i> |                 |                                 |
| Average                 | 18.9            | vs. Disadvantaged ( $p = .36$ ) |
| <b>Disadvantaged</b>    | <b>22.1</b>     | vs. Affluent ( $p = 0.01$ )     |
| Affluent                | 11.7            | vs. Average ( $p = 0.005$ )     |

## Extreme Heat and Cognitive Decline

3

**Supplementary Table 2.** Growth Curve Models of the Associations between Extreme Heat Exposure and Cognitive Function

Trajectories, U.S. Health and Retirement Study, 2006-2018

|                                                       | Model 1:<br>Average association |         |                |         | Model 2:<br>Racial/ethnic interaction |         |                |                  | Model 3:<br>Neighbourhood SES interaction |         |                |              |
|-------------------------------------------------------|---------------------------------|---------|----------------|---------|---------------------------------------|---------|----------------|------------------|-------------------------------------------|---------|----------------|--------------|
|                                                       | Intercept                       |         | Rate of change |         | Intercept                             |         | Rate of change |                  | Intercept                                 |         | Rate of change |              |
|                                                       | b                               | p value | b              | p value | b                                     | p value | b              | p value          | b                                         | p value | b              | p value      |
| <i>Fixed effects</i>                                  |                                 |         |                |         |                                       |         |                |                  |                                           |         |                |              |
| Age (centred at age 65)                               | -0.12                           | <0.001  |                |         | -0.12                                 | <0.001  |                |                  | -0.12                                     | <0.001  |                |              |
| Age squared                                           | -0.01                           | <0.001  |                |         | -0.01                                 | <0.001  |                |                  | -0.01                                     | <0.001  |                |              |
| Heat                                                  | -0.03                           | 0.83    | 0.002          | 0.85    | -0.04                                 | 0.77    | 0.01           | 0.23             | -0.06                                     | 0.70    | 0.01           | 0.29         |
| <b>Heat × Non-Hispanic Black<sup>a</sup></b>          |                                 |         |                |         | -0.04                                 | 0.91    | <b>-0.08</b>   | <b>&lt;0.001</b> |                                           |         |                |              |
| Heat × Hispanic <sup>a</sup>                          |                                 |         |                |         | 0.15                                  | 0.78    | 0.003          | 0.93             |                                           |         |                |              |
| <b>Heat × Disadvantaged neighbourhood<sup>b</sup></b> |                                 |         |                |         |                                       |         |                |                  | 0.14                                      | 0.66    | <b>-0.07</b>   | <b>0.002</b> |
| Heat × Affluent neighbourhood <sup>c</sup>            |                                 |         |                |         |                                       |         |                |                  | 0.04                                      | 0.91    | -0.00          | 0.98         |
| Female                                                | 0.99                            | <0.001  | -0.02          | 0.01    | 0.99                                  | <0.001  | -0.02          | 0.01             | 0.99                                      | <0.001  | -0.02          | 0.006        |
| Race/ethnicity (ref: White)                           |                                 |         |                |         |                                       |         |                |                  |                                           |         |                |              |
| Black                                                 | -2.41                           | <0.001  | -0.02          | 0.03    | -2.41                                 | <0.001  | 0.00           | 0.99             | -2.41                                     | <0.001  | -0.02          | 0.03         |
| Hispanic                                              | -1.99                           | <0.001  | -0.002         | 0.85    | -2.01                                 | <0.001  | -0.002         | 0.87             | -1.99                                     | <0.001  | -0.01          | 0.64         |
| Neighbourhood SES (ref: average)                      |                                 |         |                |         |                                       |         |                |                  |                                           |         |                |              |
| Disadvantaged neighbourhood                           | -0.61                           | <0.001  | 0.01           | 0.29    | -0.60                                 | <0.001  | 0.01           | 0.32             | -0.64                                     | <0.001  | 0.03           | 0.02         |
| Affluent neighbourhood                                | 0.65                            | <0.001  | -0.01          | 0.12    | 0.65                                  | <0.001  | -0.01          | 0.13             | 0.65                                      | <0.001  | -0.01          | 0.17         |
| Living alone, not married/partnered                   | -0.01                           | 0.86    | 0.01           | 0.03    | -0.01                                 | 0.88    | 0.01           | 0.02             | -0.01                                     | 0.87    | 0.01           | 0.03         |
| ≥ Some college education                              | 2.05                            | <0.001  | -0.01          | 0.08    | 2.05                                  | <0.001  | -0.01          | 0.07             | 2.05                                      | <0.001  | -0.01          | 0.07         |
| Household wealth                                      | 0.02                            | <0.001  | 0.002          | <0.001  | 0.02                                  | <0.001  | 0.002          | <0.001           | 0.02                                      | <0.001  | 0.002          | <0.001       |
| Region of residence (ref: Northeast)                  |                                 |         |                |         |                                       |         |                |                  |                                           |         |                |              |
| Midwest                                               | -0.04                           | 0.79    | 0.002          | 0.86    | -0.04                                 | 0.79    | 0.001          | 0.89             | -0.04                                     | 0.79    | 0.001          | 0.88         |
| South                                                 | -0.20                           | 0.17    | 0.002          | 0.79    | -0.19                                 | 0.17    | 0.001          | 0.89             | -0.19                                     | 0.18    | 0.001          | 0.88         |
| West                                                  | -0.13                           | 0.41    | -0.004         | 0.69    | -0.12                                 | 0.42    | -0.004         | 0.74             | -0.12                                     | 0.42    | -0.01          | 0.65         |
| Urbanicity                                            | 0.20                            | 0.05    | 0.01           | 0.30    | 0.20                                  | 0.06    | 0.007          | 0.35             | 0.20                                      | 0.06    | 0.01           | 0.33         |

## Extreme Heat and Cognitive Decline

4

## Length of follow-up (ref: 2 years)

|                       |          |        |              |        |          |        |              |        |          |        |              |        |
|-----------------------|----------|--------|--------------|--------|----------|--------|--------------|--------|----------|--------|--------------|--------|
| 4 years               | 0.19     | 0.41   | -0.01        | 0.78   | 0.19     | 0.42   | -0.004       | 0.81   | 0.19     | 0.42   | -0.004       | 0.80   |
| 6 years               | 0.02     | 0.94   | -0.004       | 0.82   | 0.01     | 0.95   | -0.004       | 0.82   | 0.02     | 0.95   | -0.003       | 0.87   |
| 8 years               | 0.59     | 0.01   | -0.03        | 0.07   | 0.59     | 0.006  | -0.03        | 0.07   | 0.58     | 0.01   | -0.03        | 0.08   |
| 10 years              | 0.45     | 0.03   | -0.01        | 0.42   | 0.45     | 0.03   | -0.01        | 0.43   | 0.45     | 0.03   | -0.01        | 0.44   |
| 12 years              | 1.10     | <0.001 | 0.05         | <0.001 | 1.10     | <0.001 | 0.05         | <0.001 | 1.10     | <0.001 | 0.05         | <0.001 |
| <i>Random effects</i> | Variance |        | 95% CI       |        | Variance |        | 95% CI       |        | Variance |        | 95% CI       |        |
| Intercept             | 6.62     |        | 6.23, 7.04   |        | 6.62     |        | 6.22, 7.03   |        | 6.62     |        | 6.23, 7.04   |        |
| Linear slope          | 0.01     |        | 0.007, 0.011 |        | 0.01     |        | 0.007, 0.010 |        | 0.01     |        | 0.007, 0.010 |        |
| Residual              | 6.49     |        | 6.32, 6.66   |        | 6.49     |        | 6.32, 6.66   |        | 6.49     |        | 6.33, 6.66   |        |

Note. <sup>a</sup> Reference group = non-Hispanic White; <sup>b</sup> Reference group = average neighbourhood.

## Extreme Heat and Cognitive Decline

5

**Supplementary Table 3.** Interaction Models with Both Race and Neighbourhood Interactions

|                                                       | Intercept |         | Rate of change |              |
|-------------------------------------------------------|-----------|---------|----------------|--------------|
|                                                       | b         | p value | b              | p value      |
| Age (centred at age 65)                               | -0.12     | <0.001  |                |              |
| Age squared                                           | -0.01     | <0.001  |                |              |
| Heat                                                  | -0.06     | 0.71    | 0.02           | 0.15         |
| <b>Heat × Non-Hispanic Black<sup>a</sup></b>          | -0.08     | 0.81    | <b>-0.06</b>   | <b>0.007</b> |
| Heat × Hispanic <sup>a</sup>                          | 0.07      | 0.90    | 0.02           | 0.53         |
| <b>Heat × Disadvantaged neighbourhood<sup>b</sup></b> | 0.16      | 0.65    | <b>-0.05</b>   | <b>0.03</b>  |
| Heat × Affluent neighbourhood <sup>b</sup>            | 0.03      | 0.93    | -0.002         | 0.93         |
| Female                                                | 0.99      | <0.001  | -0.02          | 0.01         |
| Race/ethnicity (ref: White)                           |           |         |                |              |
| Black                                                 | -2.40     | <0.001  | -0.05          | 0.69         |
| Hispanic                                              | -2.00     | <0.001  | -0.01          | 0.59         |
| Neighbourhood SES (ref: average)                      |           |         |                |              |
| Disadvantaged neighbourhood                           | -0.64     | <0.001  | 0.02           | 0.06         |
| Affluent neighbourhood                                | 0.65      | <0.001  | -0.01          | 0.17         |
| Living alone, not married/partnered                   | -0.01     | 0.88    | 0.01           | 0.02         |
| ≥ Some college education                              | 2.05      | <0.001  | -0.01          | 0.06         |
| Household wealth                                      | 0.02      | <0.001  | 0.002          | <0.001       |
| Region of residence (ref: Northeast)                  |           |         |                |              |
| Midwest                                               | -0.04     | 0.79    | 0.001          | 0.91         |
| South                                                 | -0.19     | 0.18    | 0.001          | 0.92         |
| West                                                  | -0.12     | 0.43    | -0.004         | 0.72         |
| Urbanicity                                            | 0.20      | 0.06    | 0.01           | 0.37         |
| Length of follow-up (ref: 2 years)                    |           |         |                |              |
| 4 years                                               | 0.19      | 0.42    | -0.004         | 0.81         |
| 6 years                                               | 0.01      | 0.96    | -0.003         | 0.86         |
| 8 years                                               | 0.58      | 0.006   | -0.03          | 0.08         |
| 10 years                                              | 0.45      | 0.03    | -0.01          | 0.44         |
| 12 years                                              | 1.10      | <0.001  | 0.05           | <0.001       |

Note. <sup>a</sup> Reference group = non-Hispanic White; <sup>b</sup> Reference group = average neighbourhood.

## Extreme Heat and Cognitive Decline

6

**Supplementary Table 4.** Growth Curve Models of the Associations between Extreme Heat Exposure and Cognitive Function Trajectories, U.S. Health and Retirement Study, 2006-2018, Continuous Measure of Extreme Heat Exposure

|                                                       | Model 1:<br>Average association |         |                |         | Model 2:<br>Racial/ethnic interaction |         |                |              | Model 3:<br>Neighbourhood SES interaction |         |                |             |
|-------------------------------------------------------|---------------------------------|---------|----------------|---------|---------------------------------------|---------|----------------|--------------|-------------------------------------------|---------|----------------|-------------|
|                                                       | Intercept                       |         | Rate of change |         | Intercept                             |         | Rate of change |              | Intercept                                 |         | Rate of change |             |
|                                                       | b                               | p value | b              | p value | b                                     | p value | b              | p value      | b                                         | p value | b              | p value     |
| Fixed Effects                                         |                                 |         |                |         |                                       |         |                |              |                                           |         |                |             |
| Age (centred at age 65)                               | -0.13                           | <0.001  |                |         | -0.13                                 | <0.001  |                |              | -0.13                                     | <0.001  |                |             |
| Age squared                                           | -0.01                           | <0.001  |                |         | -0.01                                 | <0.001  |                |              | -0.01                                     | <0.001  |                |             |
| Heat                                                  | 0.03                            | 0.25    | -0.002         | 0.20    | 0.02                                  | 0.51    | -0.001         | 0.69         | 0.02                                      | 0.53    | -0.001         | 0.51        |
| <b>Heat × Non-Hispanic Black<sup>a</sup></b>          |                                 |         |                |         | -0.02                                 | 0.71    | <b>-0.01</b>   | <b>0.001</b> |                                           |         |                |             |
| Heat × Hispanic <sup>a</sup>                          |                                 |         |                |         | 0.12                                  | 0.11    | -0.001         | 0.85         |                                           |         |                |             |
| <b>Heat × Disadvantaged neighbourhood<sup>b</sup></b> |                                 |         |                |         |                                       |         |                |              | 0.08                                      | 0.12    | <b>-0.01</b>   | <b>0.02</b> |
| Heat × Affluent neighbourhood <sup>c</sup>            |                                 |         |                |         |                                       |         |                |              | -0.01                                     | 0.80    | 0.003          | 0.34        |

*Note.* <sup>a</sup> Reference group = non-Hispanic White; <sup>b</sup> Reference group = average neighbourhood; All models were adjusted for race/ethnicity, neighbourhood socioeconomic status, sex, living arrangement, education, household wealth, region of residence, urbanicity, and years of follow-up.

## Extreme Heat and Cognitive Decline

7

**Supplementary Table 5.** Growth Curve Models of the Associations between Extreme Heat Exposure and Cognitive FunctionTrajectories Moderated by Subgroups, U.S. Health and Retirement Study, 2006-2018, 99<sup>th</sup> Threshold for Extreme Heat

|                                                       | Model 1:<br>Average association |         |                |         | Model 2:<br>Racial/ethnic interaction |         |                |                  | Model 3:<br>Neighbourhood SES interaction |         |                |                  |
|-------------------------------------------------------|---------------------------------|---------|----------------|---------|---------------------------------------|---------|----------------|------------------|-------------------------------------------|---------|----------------|------------------|
|                                                       | Intercept                       |         | Rate of change |         | Intercept                             |         | Rate of change |                  | Intercept                                 |         | Rate of change |                  |
|                                                       | b                               | p value | b              | p value | b                                     | p value | b              | p value          | b                                         | p value | b              | p value          |
| Fixed Effects                                         |                                 |         |                |         |                                       |         |                |                  |                                           |         |                |                  |
| Age (centred at age 65)                               | -0.12                           | <0.001  |                |         | -0.12                                 | <0.001  |                |                  | -0.12                                     | <0.001  |                |                  |
| Age squared                                           | -0.01                           | <0.001  |                |         | -0.01                                 | <0.001  |                |                  | -0.01                                     | <0.001  |                |                  |
| Heat                                                  | 0.02                            | 0.84    | -0.002         | 0.81    | 0.02                                  | 0.88    | 0.01           | 0.40             | 0.02                                      | 0.88    | 0.01           | 0.27             |
| <b>Heat × Non-Hispanic Black<sup>a</sup></b>          |                                 |         |                |         | -0.17                                 | 0.59    | <b>-0.09</b>   | <b>&lt;0.001</b> |                                           |         |                |                  |
| Heat × Hispanic <sup>a</sup>                          |                                 |         |                |         | 0.28                                  | 0.63    | 0.003          | 0.93             |                                           |         |                |                  |
| <b>Heat × Disadvantaged neighbourhood<sup>b</sup></b> |                                 |         |                |         |                                       |         |                |                  | 0.01                                      | 0.98    | <b>-0.08</b>   | <b>&lt;0.001</b> |
| Heat × Affluent neighbourhood <sup>c</sup>            |                                 |         |                |         |                                       |         |                |                  | -0.01                                     | 0.97    | 0.01           | 0.81             |

*Note.* <sup>a</sup> Reference group = non-Hispanic White; <sup>b</sup> Reference group = average neighbourhood; All models were adjusted for race/ethnicity, neighbourhood socioeconomic status, sex, living arrangement, education, household wealth, region of residence, urbanicity, and years of follow-up.

## Extreme Heat and Cognitive Decline

8

**Supplementary Table 6.** Growth Curve Models of the Associations between Extreme Heat Exposure and Cognitive Function

Trajectories Moderated by Subgroups, U.S. Health and Retirement Study, 2006-2018, Completers

|                                                       | Model 1:<br>Average association |         |                |         | Model 2:<br>Racial/ethnic interaction |         |                |             | Model 3:<br>Neighbourhood SES interaction |         |                |             |
|-------------------------------------------------------|---------------------------------|---------|----------------|---------|---------------------------------------|---------|----------------|-------------|-------------------------------------------|---------|----------------|-------------|
|                                                       | Intercept                       |         | Rate of change |         | Intercept                             |         | Rate of change |             | Intercept                                 |         | Rate of change |             |
|                                                       | b                               | p value | b              | p value | b                                     | p value | b              | p value     | b                                         | p value | b              | p value     |
| Fixed Effects                                         |                                 |         |                |         |                                       |         |                |             |                                           |         |                |             |
| Age (centred at age 65)                               | -0.08                           | <0.001  |                |         | -0.08                                 | <0.001  |                |             | -0.08                                     | <0.001  |                |             |
| Age squared                                           | -0.004                          | <0.001  |                |         | -0.004                                | <0.001  |                |             | -0.004                                    | <0.001  |                |             |
| Heat                                                  | 0.14                            | 0.39    | -0.01          | 0.57    | 0.20                                  | 0.29    | 0.004          | 0.74        | 0.22                                      | 0.22    | 0.002          | 0.85        |
| <b>Heat × Non-Hispanic Black<sup>a</sup></b>          |                                 |         |                |         | -0.31                                 | 0.43    | <b>-0.07</b>   | <b>0.01</b> |                                           |         |                |             |
| Heat × Hispanic <sup>a</sup>                          |                                 |         |                |         | -0.24                                 | 0.70    | -0.01          | 0.72        |                                           |         |                |             |
| <b>Heat × Disadvantaged neighbourhood<sup>b</sup></b> |                                 |         |                |         |                                       |         |                |             | -0.63                                     | 0.19    | <b>-0.07</b>   | <b>0.03</b> |
| Heat × Affluent neighbourhood <sup>c</sup>            |                                 |         |                |         |                                       |         |                |             | -0.03                                     | 0.96    | -0.01          | 0.87        |

*Note.* <sup>a</sup> Reference group = non-Hispanic White; <sup>b</sup> Reference group = average neighbourhood; All models were adjusted for race/ethnicity, neighbourhood socioeconomic status, sex, living arrangement, education, household wealth, region of residence, urbanicity, and years of follow-up.



## Extreme Heat and Cognitive Decline

9

**Supplementary Table 7.** Growth Curve Models of the Associations between Extreme Heat Exposure and Cognitive Function

Trajectories Stratified by Race/ethnicity, U.S. Health and Retirement Study, 2006-2018

|                                      | Stratified Model 1: Whites |         |                |         | Stratified Model 2: Black |             |                |              | Stratified Model 3: Hispanic |         |                |         |
|--------------------------------------|----------------------------|---------|----------------|---------|---------------------------|-------------|----------------|--------------|------------------------------|---------|----------------|---------|
|                                      | Intercept                  |         | Rate of change |         | Intercept                 |             | Rate of change |              | Intercept                    |         | Rate of change |         |
| Fixed Effects                        | b                          | p value | b              | p value | b                         | p value     | b              | p value      | b                            | p value | b              | p value |
| Age (centred at age 65)              | -0.12                      | <0.001  |                |         | -0.14                     | 0.001       |                |              | -0.21                        | <0.001  |                |         |
| Age squared                          | -0.01                      | <0.001  |                |         | -0.004                    | <0.001      |                |              | -0.01                        | <0.001  |                |         |
| Heat                                 | -0.09                      | 0.55    | 0.01           | 0.19    | <b>0.19</b>               | <b>0.54</b> | <b>-0.06</b>   | <b>0.004</b> | -0.13                        | 0.81    | -0.004         | 0.90    |
| Female                               | 1.14                       | <0.001  | -0.02          | <0.001  | 0.74                      | 0.002       | 0.01           | 0.66         | -0.57                        | 0.01    | 0.01           | 0.53    |
| Neighbourhood SES (ref: average)     |                            |         |                |         |                           |             |                |              |                              |         |                |         |
| Disadvantaged neighbourhood          | -0.19                      | 0.39    | 0.01           | 0.36    | -0.37                     | 0.12        | -0.01          | 0.68         | -1.62                        | <0.001  | 0.01           | 0.66    |
| Affluent neighbourhood               | 0.68                       | <0.001  | -0.01          | 0.21    | 0.79                      | 0.12        | -0.02          | 0.45         | 1.15                         | 0.003   | -0.03          | 0.42    |
| Living alone, not married/partnered  | -0.05                      | 0.62    | 0.02           | 0.03    | 0.19                      | 0.28        | -0.001         | 0.93         | -0.002                       | 0.99    | 0.02           | 0.31    |
| ≥ Some college education             | 1.90                       | <0.001  | -0.01          | 0.13    | 3.21                      | <0.001      | -0.03          | 0.13         | 2.13                         | <0.001  | 0.02           | 0.38    |
| Household wealth                     | 0.02                       | <0.001  | 0.002          | <0.001  | 0.02                      | 0.08        | 0.001          | 0.16         | 0.03                         | 0.006   | 0.001          | 0.19    |
| Region of residence (ref: Northeast) |                            |         |                |         |                           |             |                |              |                              |         |                |         |
| Midwest                              | -0.13                      | 0.38    | 0.01           | 0.52    | 0.27                      | 0.50        | -0.05          | 0.046        | 1.98                         | 0.006   | -0.11          | 0.01    |
| South                                | -0.20                      | 0.21    | 0.003          | 0.79    | -0.57                     | 0.13        | -0.01          | 0.67         | 1.22                         | 0.01    | -0.01          | 0.69    |
| West                                 | -0.22                      | 0.18    | 0.002          | 0.86    | -0.11                     | 0.80        | -0.03          | 0.45         | 1.12                         | 0.01    | -0.04          | 0.26    |
| Urbanicity                           | 0.16                       | 0.17    | 0.003          | 0.74    | 0.29                      | 0.42        | 0.06           | 0.004        | 0.60                         | 0.24    | 0.02           | 0.50    |
| Length of follow-up (ref: 2 years)   |                            |         |                |         |                           |             |                |              |                              |         |                |         |
| 4 years                              | 0.33                       | 0.21    | -0.01          | 0.64    | -0.07                     | 0.90        | -0.03          | 0.43         | -0.87                        | 0.26    | 0.10           | 0.11    |
| 6 years                              | -0.03                      | 0.93    | -0.001         | 0.97    | 0.26                      | 0.66        | -0.07          | 0.12         | -0.38                        | 0.56    | 0.08           | 0.09    |
| 8 years                              | 0.54                       | 0.02    | -0.03          | 0.08    | 1.07                      | 0.10        | -0.04          | 0.39         | -0.01                        | 0.99    | 0.04           | 0.45    |
| 10 years                             | 0.43                       | 0.06    | -0.02          | 0.26    | 1.19                      | 0.048       | 0.01           | 0.84         | -0.27                        | 0.66    | 0.03           | 0.42    |
| 12 years                             | 1.15                       | <0.001  | 0.04           | 0.001   | 1.23                      | 0.008       | 0.04           | 0.26         | 0.26                         | 0.63    | 0.13           | <0.001  |

**Supplementary Table 8.** Growth Curve Models of the Associations between Extreme Heat Exposure and Cognitive Function

Trajectories Moderated by Subgroups, U.S. Health and Retirement Study, 2006-2018, Persistent Extreme Heat Exposure

|                                                       | Model 1:<br>Average association |         |                |              | Model 2:<br>Racial/ethnic interaction |         |                |                  | Model 3:<br>Neighbourhood SES interaction |         |                |             |
|-------------------------------------------------------|---------------------------------|---------|----------------|--------------|---------------------------------------|---------|----------------|------------------|-------------------------------------------|---------|----------------|-------------|
|                                                       | Intercept                       |         | Rate of change |              | Intercept                             |         | Rate of change |                  | Intercept                                 |         | Rate of change |             |
|                                                       | b                               | p value | b              | p value      | b                                     | p value | b              | p value          | b                                         | p value | b              | p value     |
| Fixed Effects                                         |                                 |         |                |              |                                       |         |                |                  |                                           |         |                |             |
| Age (centred at age 65)                               | -0.13                           | <0.001  |                |              | -0.13                                 | <0.001  |                |                  | -0.13                                     | <0.001  |                |             |
| Age squared                                           | -0.01                           | <0.001  |                |              | -0.01                                 | <0.001  |                |                  | -0.01                                     | <0.001  |                |             |
| Heat                                                  | 0.02                            | 0.43    | <b>-0.01</b>   | <b>0.007</b> | 0.02                                  | 0.48    | -0.004         | 0.08             | 0.02                                      | 0.55    | <b>-0.01</b>   | <b>0.04</b> |
| <b>Heat × Non-Hispanic Black<sup>a</sup></b>          |                                 |         |                |              | -0.01                                 | 0.94    | <b>-0.02</b>   | <b>&lt;0.001</b> |                                           |         |                |             |
| Heat × Hispanic <sup>a</sup>                          |                                 |         |                |              | -0.02                                 | 0.86    | 0.01           | 0.37             |                                           |         |                |             |
| <b>Heat × Disadvantaged neighbourhood<sup>b</sup></b> |                                 |         |                |              |                                       |         |                |                  | -0.03                                     | 0.75    | -0.01          | 0.27        |
| Heat × Affluent neighbourhood <sup>c</sup>            |                                 |         |                |              |                                       |         |                |                  | 0.04                                      | 0.56    | 0.001          | 0.77        |

*Note.* <sup>a</sup> Reference group = non-Hispanic White; <sup>b</sup> Reference group = average neighbourhood; All models were adjusted for race/ethnicity, neighbourhood socioeconomic status, sex, living arrangement, education, household wealth, region of residence, urbanicity, and years of follow-up. Persistent exposure to extreme heat was measured with a score representing the proportion of each HRS participant's follow-up period spent in census tracts with high heat exposure. This score, ranging from 0 to 10, a score of 1 signifies that 10% of the follow-up period was spent in such conditions, while a score of 10 indicates a consistent, or 100%, exposure to extreme heat throughout the follow-up period.
